# Supplementary material for: Reference equations for pulmonary diffusing capacity using segmented regression show similar predictive accuracy as GAMLSS models
Source: HighWire-hosted journal article supplement (doi:10.1136/bmjresp-2021-001087), 2022-02-01
Supplement: bmjresp-2021-001087supp002_data_supplement.xlsx [file bmjresp-2021-001087supp002_data_supplement.xlsx]

## Sheet: Mspline Male DLNO
	age	Mspline
1	5	-0.174002
2	5.25	-0.175677
3	5.5	-0.177353
4	5.75	-0.179028
5	6	-0.180702
6	6.25	-0.182374
7	6.5	-0.184044
8	6.75	-0.185711
9	7	-0.187373
10	7.25	-0.189029
11	7.5	-0.190678
12	7.75	-0.192318
13	8	-0.193949
14	8.25	-0.19557
15	8.5	-0.197179
16	8.75	-0.198775
17	9	-0.200359
18	9.25	-0.201928
19	9.5	-0.203481
20	9.75	-0.205019
21	10	-0.20654
22	10.25	-0.208043
23	10.5	-0.209528
24	10.75	-0.210993
25	11	-0.212439
26	11.25	-0.213864
27	11.5	-0.21527
28	11.75	-0.216655
29	12	-0.21802
30	12.25	-0.219366
31	12.5	-0.220693
32	12.75	-0.222003
33	13	-0.223295
34	13.25	-0.224573
35	13.5	-0.225836
36	13.75	-0.227086
37	14	-0.228325
38	14.25	-0.229555
39	14.5	-0.230777
40	14.75	-0.231994
41	15	-0.233207
42	15.25	-0.234419
43	15.5	-0.235631
44	15.75	-0.236846
45	16	-0.238066
46	16.25	-0.239291
47	16.5	-0.240524
48	16.75	-0.241767
49	17	-0.24302
50	17.25	-0.244286
51	17.5	-0.245566
52	17.75	-0.246862
53	18	-0.248175
54	18.25	-0.249506
55	18.5	-0.250857
56	18.75	-0.252229
57	19	-0.253624
58	19.25	-0.255043
59	19.5	-0.256487
60	19.75	-0.257958
61	20	-0.259458
62	20.25	-0.260987
63	20.5	-0.262546
64	20.75	-0.264137
65	21	-0.265761
66	21.25	-0.267418
67	21.5	-0.269108
68	21.75	-0.270834
69	22	-0.272595
70	22.25	-0.274392
71	22.5	-0.276225
72	22.75	-0.278095
73	23	-0.280003
74	23.25	-0.281947
75	23.5	-0.283929
76	23.75	-0.285949
77	24	-0.288007
78	24.25	-0.290103
79	24.5	-0.292236
80	24.75	-0.294406
81	25	-0.296614
82	25.25	-0.298857
83	25.5	-0.301137
84	25.75	-0.303452
85	26	-0.305802
86	26.25	-0.308187
87	26.5	-0.310606
88	26.75	-0.313059
89	27	-0.315544
90	27.25	-0.318062
91	27.5	-0.320611
92	27.75	-0.323191
93	28	-0.325801
94	28.25	-0.32844
95	28.5	-0.331108
96	28.75	-0.333804
97	29	-0.336527
98	29.25	-0.339277
99	29.5	-0.342052
100	29.75	-0.344853
101	30	-0.347679
102	30.25	-0.350529
103	30.5	-0.353405
104	30.75	-0.356304
105	31	-0.359226
106	31.25	-0.362171
107	31.5	-0.365139
108	31.75	-0.368127
109	32	-0.371137
110	32.25	-0.374167
111	32.5	-0.377216
112	32.75	-0.380284
113	33	-0.38337
114	33.25	-0.386473
115	33.5	-0.389593
116	33.75	-0.39273
117	34	-0.395884
118	34.25	-0.399053
119	34.5	-0.402238
120	34.75	-0.405439
121	35	-0.408654
122	35.25	-0.411883
123	35.5	-0.415127
124	35.75	-0.418385
125	36	-0.421656
126	36.25	-0.42494
127	36.5	-0.428237
128	36.75	-0.431547
129	37	-0.434869
130	37.25	-0.438202
131	37.5	-0.441548
132	37.75	-0.444905
133	38	-0.448274
134	38.25	-0.451654
135	38.5	-0.455046
136	38.75	-0.458449
137	39	-0.461864
138	39.25	-0.465291
139	39.5	-0.46873
140	39.75	-0.472182
141	40	-0.475647
142	40.25	-0.479124
143	40.5	-0.482615
144	40.75	-0.486119
145	41	-0.489637
146	41.25	-0.493169
147	41.5	-0.496716
148	41.75	-0.500276
149	42	-0.503851
150	42.25	-0.50744
151	42.5	-0.511043
152	42.75	-0.51466
153	43	-0.518292
154	43.25	-0.521938
155	43.5	-0.525598
156	43.75	-0.529272
157	44	-0.532961
158	44.25	-0.536663
159	44.5	-0.540379
160	44.75	-0.544108
161	45	-0.547851
162	45.25	-0.551608
163	45.5	-0.555377
164	45.75	-0.55916
165	46	-0.562957
166	46.25	-0.566766
167	46.5	-0.570589
168	46.75	-0.574424
169	47	-0.578272
170	47.25	-0.582132
171	47.5	-0.586004
172	47.75	-0.589888
173	48	-0.593784
174	48.25	-0.597692
175	48.5	-0.601612
176	48.75	-0.605543
177	49	-0.609486
178	49.25	-0.613441
179	49.5	-0.617408
180	49.75	-0.621387
181	50	-0.625378
182	50.25	-0.62938
183	50.5	-0.633395
184	50.75	-0.637421
185	51	-0.641459
186	51.25	-0.645508
187	51.5	-0.649569
188	51.75	-0.653642
189	52	-0.657726
190	52.25	-0.661822
191	52.5	-0.665929
192	52.75	-0.670048
193	53	-0.674177
194	53.25	-0.678319
195	53.5	-0.682471
196	53.75	-0.686635
197	54	-0.69081
198	54.25	-0.694997
199	54.5	-0.699195
200	54.75	-0.703404
201	55	-0.707625
202	55.25	-0.711856
203	55.5	-0.716099
204	55.75	-0.720353
205	56	-0.724618
206	56.25	-0.728895
207	56.5	-0.733182
208	56.75	-0.737481
209	57	-0.741789
210	57.25	-0.746109
211	57.5	-0.750438
212	57.75	-0.754778
213	58	-0.759128
214	58.25	-0.763489
215	58.5	-0.767861
216	58.75	-0.772243
217	59	-0.776637
218	59.25	-0.781042
219	59.5	-0.785459
220	59.75	-0.789887
221	60	-0.794327
222	60.25	-0.798779
223	60.5	-0.803242
224	60.75	-0.807716
225	61	-0.812202
226	61.25	-0.8167
227	61.5	-0.821209
228	61.75	-0.82573
229	62	-0.830263
230	62.25	-0.834809
231	62.5	-0.839367
232	62.75	-0.843939
233	63	-0.848525
234	63.25	-0.853125
235	63.5	-0.857739
236	63.75	-0.862369
237	64	-0.867014
238	64.25	-0.871675
239	64.5	-0.876353
240	64.75	-0.881048
241	65	-0.885761
242	65.25	-0.890492
243	65.5	-0.895241
244	65.75	-0.900008
245	66	-0.904795
246	66.25	-0.9096
247	66.5	-0.914425
248	66.75	-0.919269
249	67	-0.924133
250	67.25	-0.929017
251	67.5	-0.933921
252	67.75	-0.938846
253	68	-0.943793
254	68.25	-0.948761
255	68.5	-0.953751
256	68.75	-0.958763
257	69	-0.963798
258	69.25	-0.968854
259	69.5	-0.973933
260	69.75	-0.979033
261	70	-0.984156
262	70.25	-0.9893
263	70.5	-0.994466
264	70.75	-0.999653
265	71	-1.00486
266	71.25	-1.01009
267	71.5	-1.01534
268	71.75	-1.02061
269	72	-1.02591
270	72.25	-1.03122
271	72.5	-1.03656
272	72.75	-1.04192
273	73	-1.0473
274	73.25	-1.0527
275	73.5	-1.05813
276	73.75	-1.06358
277	74	-1.06905
278	74.25	-1.07455
279	74.5	-1.08006
280	74.75	-1.0856
281	75	-1.09116
282	75.25	-1.09675
283	75.5	-1.10236
284	75.75	-1.10799
285	76	-1.11364
286	76.25	-1.11932
287	76.5	-1.12502
288	76.75	-1.13074
289	77	-1.13649
290	77.25	-1.14227
291	77.5	-1.14807
292	77.75	-1.15389
293	78	-1.15974
294	78.25	-1.16561
295	78.5	-1.17151
296	78.75	-1.17743
297	79	-1.18339
298	79.25	-1.18936
299	79.5	-1.19536
300	79.75	-1.20139
301	80	-1.20745
302	80.25	-1.21353
303	80.5	-1.21963
304	80.75	-1.22577
305	81	-1.23192
306	81.25	-1.23811
307	81.5	-1.24431
308	81.75	-1.25054
309	82	-1.2568
310	82.25	-1.26308
311	82.5	-1.26938
312	82.75	-1.27571
313	83	-1.28205
314	83.25	-1.28842
315	83.5	-1.29481
316	83.75	-1.30121
317	84	-1.30764
318	84.25	-1.31408
319	84.5	-1.32055
320	84.75	-1.32702
321	85	-1.33352
322	85.25	-1.34003
323	85.5	-1.34656
324	85.75	-1.3531
325	86	-1.35965
326	86.25	-1.36622
327	86.5	-1.3728
328	86.75	-1.37939
329	87	-1.386
330	87.25	-1.39262
331	87.5	-1.39924
332	87.75	-1.40588
333	88	-1.41252
334	88.25	-1.41918
335	88.5	-1.42584
336	88.75	-1.43251
337	89	-1.43919
338	89.25	-1.44588
339	89.5	-1.45257
340	89.75	-1.45928
341	90	-1.46598
342	90.25	-1.4727
343	90.5	-1.47942
344	90.75	-1.48614
345	91	-1.49287
346	91.25	-1.4996
347	91.5	-1.50634
348	91.75	-1.51308
349	92	-1.51983
350	92.25	-1.52658
351	92.5	-1.53333
352	92.75	-1.54008
353	93	-1.54683
354	93.25	-1.55359
355	93.5	-1.56035
356	93.75	-1.5671
357	94	-1.57386
358	94.25	-1.58062
359	94.5	-1.58738
360	94.75	-1.59413
361	95	-1.60089

## Sheet: Mspline Female DLNO
	age	Mspline
1	5	-0.13145
2	5.25	-0.13361
3	5.5	-0.135771
4	5.75	-0.137932
5	6	-0.140093
6	6.25	-0.142255
7	6.5	-0.144416
8	6.75	-0.146576
9	7	-0.148734
10	7.25	-0.15089
11	7.5	-0.153042
12	7.75	-0.155191
13	8	-0.157335
14	8.25	-0.159473
15	8.5	-0.161605
16	8.75	-0.163729
17	9	-0.165844
18	9.25	-0.16795
19	9.5	-0.170046
20	9.75	-0.17213
21	10	-0.174202
22	10.25	-0.17626
23	10.5	-0.178306
24	10.75	-0.180337
25	11	-0.182355
26	11.25	-0.184359
27	11.5	-0.186349
28	11.75	-0.188327
29	12	-0.190294
30	12.25	-0.19225
31	12.5	-0.194196
32	12.75	-0.196133
33	13	-0.198062
34	13.25	-0.199984
35	13.5	-0.2019
36	13.75	-0.203811
37	14	-0.205719
38	14.25	-0.207623
39	14.5	-0.209527
40	14.75	-0.211429
41	15	-0.213333
42	15.25	-0.215237
43	15.5	-0.217144
44	15.75	-0.219055
45	16	-0.220968
46	16.25	-0.222887
47	16.5	-0.22481
48	16.75	-0.226739
49	17	-0.228673
50	17.25	-0.230614
51	17.5	-0.232561
52	17.75	-0.234516
53	18	-0.236479
54	18.25	-0.238451
55	18.5	-0.240431
56	18.75	-0.242422
57	19	-0.244424
58	19.25	-0.246437
59	19.5	-0.248461
60	19.75	-0.250498
61	20	-0.252548
62	20.25	-0.254612
63	20.5	-0.256689
64	20.75	-0.258782
65	21	-0.260889
66	21.25	-0.263012
67	21.5	-0.26515
68	21.75	-0.267305
69	22	-0.269475
70	22.25	-0.271661
71	22.5	-0.273864
72	22.75	-0.276083
73	23	-0.278318
74	23.25	-0.280569
75	23.5	-0.282837
76	23.75	-0.28512
77	24	-0.28742
78	24.25	-0.289736
79	24.5	-0.292068
80	24.75	-0.294417
81	25	-0.296782
82	25.25	-0.299164
83	25.5	-0.301563
84	25.75	-0.303977
85	26	-0.306408
86	26.25	-0.308855
87	26.5	-0.311318
88	26.75	-0.313798
89	27	-0.316293
90	27.25	-0.318805
91	27.5	-0.321334
92	27.75	-0.32388
93	28	-0.326444
94	28.25	-0.329026
95	28.5	-0.331626
96	28.75	-0.334244
97	29	-0.336882
98	29.25	-0.339538
99	29.5	-0.342215
100	29.75	-0.344911
101	30	-0.347627
102	30.25	-0.350364
103	30.5	-0.353121
104	30.75	-0.355899
105	31	-0.358697
106	31.25	-0.361516
107	31.5	-0.364354
108	31.75	-0.367212
109	32	-0.370089
110	32.25	-0.372985
111	32.5	-0.375899
112	32.75	-0.37883
113	33	-0.381779
114	33.25	-0.384745
115	33.5	-0.387728
116	33.75	-0.390728
117	34	-0.393744
118	34.25	-0.396775
119	34.5	-0.399823
120	34.75	-0.402886
121	35	-0.405964
122	35.25	-0.409058
123	35.5	-0.412166
124	35.75	-0.415289
125	36	-0.418426
126	36.25	-0.421577
127	36.5	-0.42474
128	36.75	-0.427917
129	37	-0.431104
130	37.25	-0.434303
131	37.5	-0.437512
132	37.75	-0.440729
133	38	-0.443955
134	38.25	-0.447188
135	38.5	-0.450427
136	38.75	-0.453673
137	39	-0.456923
138	39.25	-0.460177
139	39.5	-0.463436
140	39.75	-0.466697
141	40	-0.469962
142	40.25	-0.473229
143	40.5	-0.476499
144	40.75	-0.47977
145	41	-0.483043
146	41.25	-0.486318
147	41.5	-0.489594
148	41.75	-0.49287
149	42	-0.496148
150	42.25	-0.499425
151	42.5	-0.502702
152	42.75	-0.50598
153	43	-0.509258
154	43.25	-0.512535
155	43.5	-0.515813
156	43.75	-0.519091
157	44	-0.522369
158	44.25	-0.525646
159	44.5	-0.528924
160	44.75	-0.532202
161	45	-0.53548
162	45.25	-0.538758
163	45.5	-0.542037
164	45.75	-0.545317
165	46	-0.548598
166	46.25	-0.551881
167	46.5	-0.555165
168	46.75	-0.558452
169	47	-0.561741
170	47.25	-0.565032
171	47.5	-0.568326
172	47.75	-0.571624
173	48	-0.574925
174	48.25	-0.57823
175	48.5	-0.581539
176	48.75	-0.584855
177	49	-0.588176
178	49.25	-0.591505
179	49.5	-0.594842
180	49.75	-0.598187
181	50	-0.601542
182	50.25	-0.604908
183	50.5	-0.608284
184	50.75	-0.611672
185	51	-0.615073
186	51.25	-0.618487
187	51.5	-0.621915
188	51.75	-0.625358
189	52	-0.628815
190	52.25	-0.632289
191	52.5	-0.635779
192	52.75	-0.639286
193	53	-0.642811
194	53.25	-0.646354
195	53.5	-0.649917
196	53.75	-0.653499
197	54	-0.657102
198	54.25	-0.660725
199	54.5	-0.66437
200	54.75	-0.668036
201	55	-0.671725
202	55.25	-0.675437
203	55.5	-0.679172
204	55.75	-0.682929
205	56	-0.686708
206	56.25	-0.69051
207	56.5	-0.694335
208	56.75	-0.698182
209	57	-0.702052
210	57.25	-0.705945
211	57.5	-0.709861
212	57.75	-0.7138
213	58	-0.717763
214	58.25	-0.72175
215	58.5	-0.72576
216	58.75	-0.729795
217	59	-0.733855
218	59.25	-0.73794
219	59.5	-0.74205
220	59.75	-0.746184
221	60	-0.750344
222	60.25	-0.754527
223	60.5	-0.758735
224	60.75	-0.762967
225	61	-0.767222
226	61.25	-0.7715
227	61.5	-0.775801
228	61.75	-0.780123
229	62	-0.784468
230	62.25	-0.788834
231	62.5	-0.793221
232	62.75	-0.797628
233	63	-0.802056
234	63.25	-0.806503
235	63.5	-0.81097
236	63.75	-0.815457
237	64	-0.819962
238	64.25	-0.824485
239	64.5	-0.829026
240	64.75	-0.833586
241	65	-0.838164
242	65.25	-0.84276
243	65.5	-0.847374
244	65.75	-0.852005
245	66	-0.856652
246	66.25	-0.861316
247	66.5	-0.865994
248	66.75	-0.870688
249	67	-0.875395
250	67.25	-0.880117
251	67.5	-0.884851
252	67.75	-0.889599
253	68	-0.894359
254	68.25	-0.89913
255	68.5	-0.903914
256	68.75	-0.908708
257	69	-0.913514
258	69.25	-0.91833
259	69.5	-0.923157
260	69.75	-0.927995
261	70	-0.932842
262	70.25	-0.9377
263	70.5	-0.942567
264	70.75	-0.947443
265	71	-0.952328
266	71.25	-0.957221
267	71.5	-0.962121
268	71.75	-0.967029
269	72	-0.971944
270	72.25	-0.976865
271	72.5	-0.981792
272	72.75	-0.986724
273	73	-0.99166
274	73.25	-0.9966
275	73.5	-1.00154
276	73.75	-1.00649
277	74	-1.01143
278	74.25	-1.01638
279	74.5	-1.02133
280	74.75	-1.02628
281	75	-1.03123
282	75.25	-1.03618
283	75.5	-1.04113
284	75.75	-1.04609
285	76	-1.05104
286	76.25	-1.056
287	76.5	-1.06096
288	76.75	-1.06591
289	77	-1.07087
290	77.25	-1.07584
291	77.5	-1.0808
292	77.75	-1.08576
293	78	-1.09072
294	78.25	-1.09568
295	78.5	-1.10064
296	78.75	-1.1056
297	79	-1.11055
298	79.25	-1.11551
299	79.5	-1.12046
300	79.75	-1.12542
301	80	-1.13037
302	80.25	-1.13532
303	80.5	-1.14027
304	80.75	-1.14521
305	81	-1.15015
306	81.25	-1.15509
307	81.5	-1.16003
308	81.75	-1.16496
309	82	-1.16989
310	82.25	-1.17481
311	82.5	-1.17974
312	82.75	-1.18465
313	83	-1.18956
314	83.25	-1.19447
315	83.5	-1.19937
316	83.75	-1.20426
317	84	-1.20915
318	84.25	-1.21403
319	84.5	-1.21891
320	84.75	-1.22378
321	85	-1.22865
322	85.25	-1.23351
323	85.5	-1.23836
324	85.75	-1.2432
325	86	-1.24804
326	86.25	-1.25287
327	86.5	-1.2577
328	86.75	-1.26251
329	87	-1.26732
330	87.25	-1.27212
331	87.5	-1.27691
332	87.75	-1.28169
333	88	-1.28647
334	88.25	-1.29124
335	88.5	-1.296
336	88.75	-1.30075
337	89	-1.30549
338	89.25	-1.31023
339	89.5	-1.31496
340	89.75	-1.31969
341	90	-1.3244
342	90.25	-1.32911
343	90.5	-1.33382
344	90.75	-1.33852
345	91	-1.34321
346	91.25	-1.3479
347	91.5	-1.35258
348	91.75	-1.35726
349	92	-1.36193
350	92.25	-1.3666
351	92.5	-1.37127
352	92.75	-1.37593
353	93	-1.38059
354	93.25	-1.38524
355	93.5	-1.38989
356	93.75	-1.39454
357	94	-1.39919
358	94.25	-1.40384
359	94.5	-1.40848
360	94.75	-1.41312
361	95	-1.41777

## Sheet: Mspline Sspline DLCO Males
	age	Mspline	Sspline
1	5	-0.207755	-0.0324676
2	5.25	-0.207848	-0.0369753
3	5.5	-0.20794	-0.041482
4	5.75	-0.208031	-0.0459869
5	6	-0.20812	-0.0504889
6	6.25	-0.208207	-0.0549868
7	6.5	-0.208289	-0.0594784
8	6.75	-0.208366	-0.0639612
9	7	-0.208436	-0.0684329
10	7.25	-0.208497	-0.0728908
11	7.5	-0.208547	-0.0773327
12	7.75	-0.208584	-0.0817561
13	8	-0.208607	-0.0861586
14	8.25	-0.208613	-0.0905384
15	8.5	-0.2086	-0.0948954
16	8.75	-0.208568	-0.0992303
17	9	-0.208515	-0.103544
18	9.25	-0.208438	-0.107837
19	9.5	-0.208338	-0.112112
20	9.75	-0.208213	-0.116371
21	10	-0.208061	-0.120619
22	10.25	-0.207882	-0.124857
23	10.5	-0.207676	-0.129089
24	10.75	-0.207441	-0.13332
25	11	-0.207177	-0.137552
26	11.25	-0.206883	-0.141791
27	11.5	-0.206559	-0.14604
28	11.75	-0.206207	-0.150302
29	12	-0.205825	-0.15458
30	12.25	-0.205415	-0.158878
31	12.5	-0.204978	-0.163195
32	12.75	-0.204516	-0.167532
33	13	-0.20403	-0.171887
34	13.25	-0.203523	-0.17626
35	13.5	-0.202996	-0.180651
36	13.75	-0.202451	-0.185059
37	14	-0.201891	-0.189482
38	14.25	-0.201318	-0.193921
39	14.5	-0.200735	-0.198375
40	14.75	-0.200145	-0.202843
41	15	-0.19955	-0.207324
42	15.25	-0.198953	-0.211817
43	15.5	-0.198358	-0.216325
44	15.75	-0.197766	-0.220848
45	16	-0.197181	-0.225386
46	16.25	-0.196604	-0.229941
47	16.5	-0.19604	-0.234515
48	16.75	-0.19549	-0.239108
49	17	-0.194957	-0.243723
50	17.25	-0.194443	-0.24836
51	17.5	-0.193952	-0.253022
52	17.75	-0.193486	-0.257711
53	18	-0.193047	-0.262429
54	18.25	-0.192638	-0.26718
55	18.5	-0.192261	-0.271964
56	18.75	-0.191918	-0.276785
57	19	-0.191612	-0.281644
58	19.25	-0.191346	-0.286544
59	19.5	-0.19112	-0.291488
60	19.75	-0.190938	-0.296477
61	20	-0.190802	-0.301515
62	20.25	-0.190713	-0.306604
63	20.5	-0.190673	-0.311744
64	20.75	-0.190685	-0.316938
65	21	-0.190748	-0.322186
66	21.25	-0.190865	-0.32749
67	21.5	-0.191037	-0.332851
68	21.75	-0.191266	-0.33827
69	22	-0.191551	-0.343746
70	22.25	-0.191895	-0.349281
71	22.5	-0.192299	-0.354873
72	22.75	-0.192762	-0.360523
73	23	-0.193286	-0.366229
74	23.25	-0.193871	-0.371991
75	23.5	-0.194517	-0.377809
76	23.75	-0.195225	-0.383682
77	24	-0.195994	-0.389609
78	24.25	-0.196826	-0.395591
79	24.5	-0.19772	-0.401626
80	24.75	-0.198675	-0.407714
81	25	-0.199693	-0.413854
82	25.25	-0.200772	-0.420047
83	25.5	-0.201913	-0.426292
84	25.75	-0.203116	-0.432591
85	26	-0.20438	-0.438944
86	26.25	-0.205705	-0.445352
87	26.5	-0.207091	-0.451812
88	26.75	-0.208536	-0.458325
89	27	-0.210041	-0.464887
90	27.25	-0.211603	-0.471497
91	27.5	-0.213224	-0.478155
92	27.75	-0.2149	-0.48486
93	28	-0.216633	-0.491611
94	28.25	-0.21842	-0.498407
95	28.5	-0.220261	-0.505247
96	28.75	-0.222154	-0.51213
97	29	-0.224099	-0.519054
98	29.25	-0.226095	-0.526018
99	29.5	-0.22814	-0.533017
100	29.75	-0.230234	-0.540051
101	30	-0.232376	-0.547114
102	30.25	-0.234564	-0.554204
103	30.5	-0.236798	-0.561319
104	30.75	-0.239078	-0.568458
105	31	-0.241401	-0.575617
106	31.25	-0.243768	-0.582795
107	31.5	-0.246177	-0.589988
108	31.75	-0.248625	-0.597192
109	32	-0.251113	-0.604404
110	32.25	-0.253639	-0.61162
111	32.5	-0.2562	-0.618837
112	32.75	-0.258796	-0.626052
113	33	-0.261426	-0.633263
114	33.25	-0.264087	-0.640467
115	33.5	-0.266779	-0.64766
116	33.75	-0.269501	-0.654841
117	34	-0.272251	-0.662007
118	34.25	-0.275028	-0.669154
119	34.5	-0.277832	-0.676282
120	34.75	-0.280661	-0.683389
121	35	-0.283514	-0.690475
122	35.25	-0.286391	-0.697538
123	35.5	-0.289289	-0.704577
124	35.75	-0.292208	-0.711594
125	36	-0.295147	-0.718585
126	36.25	-0.298105	-0.725553
127	36.5	-0.301082	-0.732494
128	36.75	-0.304077	-0.739408
129	37	-0.307089	-0.746294
130	37.25	-0.310119	-0.753149
131	37.5	-0.313164	-0.759973
132	37.75	-0.316226	-0.766765
133	38	-0.319303	-0.773524
134	38.25	-0.322394	-0.780248
135	38.5	-0.325499	-0.786936
136	38.75	-0.328618	-0.793588
137	39	-0.33175	-0.800202
138	39.25	-0.334895	-0.806778
139	39.5	-0.338053	-0.813313
140	39.75	-0.341223	-0.819809
141	40	-0.344405	-0.826263
142	40.25	-0.347599	-0.832675
143	40.5	-0.350806	-0.839043
144	40.75	-0.354025	-0.845365
145	41	-0.357258	-0.85164
146	41.25	-0.360502	-0.857866
147	41.5	-0.36376	-0.86404
148	41.75	-0.367029	-0.870159
149	42	-0.37031	-0.876219
150	42.25	-0.373603	-0.882218
151	42.5	-0.376907	-0.888151
152	42.75	-0.380221	-0.894015
153	43	-0.383547	-0.899806
154	43.25	-0.386882	-0.90552
155	43.5	-0.390228	-0.911153
156	43.75	-0.393583	-0.916703
157	44	-0.396947	-0.922166
158	44.25	-0.400319	-0.92754
159	44.5	-0.4037	-0.932822
160	44.75	-0.407088	-0.938009
161	45	-0.410485	-0.9431
162	45.25	-0.413889	-0.948093
163	45.5	-0.4173	-0.952985
164	45.75	-0.420719	-0.957773
165	46	-0.424146	-0.962456
166	46.25	-0.427581	-0.967031
167	46.5	-0.431022	-0.971497
168	46.75	-0.434472	-0.975854
169	47	-0.437929	-0.980099
170	47.25	-0.441392	-0.984234
171	47.5	-0.444863	-0.988258
172	47.75	-0.448341	-0.992172
173	48	-0.451826	-0.995975
174	48.25	-0.455317	-0.99967
175	48.5	-0.458814	-1.00326
176	48.75	-0.462319	-1.00674
177	49	-0.465832	-1.01012
178	49.25	-0.469352	-1.0134
179	49.5	-0.47288	-1.01658
180	49.75	-0.476416	-1.01967
181	50	-0.479962	-1.02267
182	50.25	-0.483517	-1.02559
183	50.5	-0.487081	-1.02842
184	50.75	-0.490656	-1.03118
185	51	-0.494241	-1.03386
186	51.25	-0.497837	-1.03647
187	51.5	-0.501445	-1.03902
188	51.75	-0.505064	-1.0415
189	52	-0.508695	-1.04393
190	52.25	-0.512339	-1.0463
191	52.5	-0.515996	-1.04863
192	52.75	-0.519666	-1.05091
193	53	-0.523348	-1.05315
194	53.25	-0.527044	-1.05536
195	53.5	-0.530753	-1.05753
196	53.75	-0.534477	-1.05967
197	54	-0.538215	-1.06177
198	54.25	-0.541969	-1.06385
199	54.5	-0.545738	-1.0659
200	54.75	-0.549523	-1.06792
201	55	-0.553324	-1.06992
202	55.25	-0.55714	-1.07189
203	55.5	-0.560973	-1.07384
204	55.75	-0.564823	-1.07577
205	56	-0.56869	-1.07767
206	56.25	-0.572574	-1.07954
207	56.5	-0.576476	-1.08139
208	56.75	-0.580395	-1.08322
209	57	-0.584332	-1.08502
210	57.25	-0.588287	-1.08679
211	57.5	-0.59226	-1.08854
212	57.75	-0.596252	-1.09026
213	58	-0.600262	-1.09197
214	58.25	-0.604291	-1.09365
215	58.5	-0.60834	-1.0953
216	58.75	-0.612409	-1.09694
217	59	-0.616498	-1.09857
218	59.25	-0.620607	-1.10017
219	59.5	-0.624736	-1.10176
220	59.75	-0.628885	-1.10334
221	60	-0.633055	-1.1049
222	60.25	-0.637244	-1.10646
223	60.5	-0.641453	-1.10799
224	60.75	-0.645682	-1.10952
225	61	-0.64993	-1.11104
226	61.25	-0.654196	-1.11254
227	61.5	-0.658482	-1.11403
228	61.75	-0.662786	-1.11551
229	62	-0.667109	-1.11699
230	62.25	-0.671451	-1.11845
231	62.5	-0.675813	-1.11991
232	62.75	-0.680193	-1.12136
233	63	-0.684592	-1.12281
234	63.25	-0.689011	-1.12425
235	63.5	-0.693449	-1.1257
236	63.75	-0.697907	-1.12714
237	64	-0.702384	-1.12859
238	64.25	-0.706881	-1.13005
239	64.5	-0.711398	-1.13152
240	64.75	-0.715935	-1.13301
241	65	-0.720491	-1.13451
242	65.25	-0.725068	-1.13603
243	65.5	-0.729664	-1.13758
244	65.75	-0.73428	-1.13915
245	66	-0.738915	-1.14075
246	66.25	-0.74357	-1.14238
247	66.5	-0.748244	-1.14403
248	66.75	-0.752937	-1.14572
249	67	-0.75765	-1.14744
250	67.25	-0.762382	-1.14919
251	67.5	-0.767134	-1.15097
252	67.75	-0.771905	-1.15279
253	68	-0.776695	-1.15464
254	68.25	-0.781505	-1.15652
255	68.5	-0.786333	-1.15843
256	68.75	-0.791179	-1.16038
257	69	-0.796043	-1.16236
258	69.25	-0.800925	-1.16437
259	69.5	-0.805824	-1.16641
260	69.75	-0.810739	-1.16849
261	70	-0.815672	-1.17058
262	70.25	-0.82062	-1.17271
263	70.5	-0.825585	-1.17485
264	70.75	-0.830566	-1.17703
265	71	-0.835563	-1.17922
266	71.25	-0.840576	-1.18143
267	71.5	-0.845605	-1.18366
268	71.75	-0.850649	-1.1859
269	72	-0.855709	-1.18817
270	72.25	-0.860784	-1.19044
271	72.5	-0.865875	-1.19273
272	72.75	-0.870981	-1.19503
273	73	-0.876102	-1.19734
274	73.25	-0.881238	-1.19966
275	73.5	-0.886388	-1.20199
276	73.75	-0.891554	-1.20433
277	74	-0.896734	-1.20668
278	74.25	-0.901929	-1.20904
279	74.5	-0.907138	-1.21141
280	74.75	-0.912361	-1.21378
281	75	-0.917598	-1.21616
282	75.25	-0.92285	-1.21854
283	75.5	-0.928115	-1.22092
284	75.75	-0.933394	-1.22331
285	76	-0.938687	-1.22569
286	76.25	-0.943994	-1.22808
287	76.5	-0.949314	-1.23047
288	76.75	-0.954649	-1.23286
289	77	-0.959997	-1.23524
290	77.25	-0.965359	-1.23761
291	77.5	-0.970735	-1.23998
292	77.75	-0.976125	-1.24234
293	78	-0.98153	-1.24468
294	78.25	-0.986948	-1.24702
295	78.5	-0.992381	-1.24934
296	78.75	-0.997828	-1.25164
297	79	-1.00329	-1.25394
298	79.25	-1.00877	-1.25621
299	79.5	-1.01426	-1.25847
300	79.75	-1.01976	-1.26072
301	80	-1.02528	-1.26295
302	80.25	-1.03081	-1.26516
303	80.5	-1.03635	-1.26735
304	80.75	-1.04191	-1.26953
305	81	-1.04748	-1.27168
306	81.25	-1.05307	-1.27381
307	81.5	-1.05866	-1.27593
308	81.75	-1.06427	-1.27801
309	82	-1.06989	-1.28008
310	82.25	-1.07552	-1.28212
311	82.5	-1.08116	-1.28414
312	82.75	-1.08682	-1.28613
313	83	-1.09248	-1.28809
314	83.25	-1.09815	-1.29003
315	83.5	-1.10383	-1.29195
316	83.75	-1.10952	-1.29383
317	84	-1.11523	-1.29569
318	84.25	-1.12093	-1.29752
319	84.5	-1.12665	-1.29933
320	84.75	-1.13238	-1.3011
321	85	-1.13811	-1.30285
322	85.25	-1.14385	-1.30457
323	85.5	-1.1496	-1.30627
324	85.75	-1.15535	-1.30793
325	86	-1.16111	-1.30957
326	86.25	-1.16688	-1.31118
327	86.5	-1.17265	-1.31276
328	86.75	-1.17843	-1.31431
329	87	-1.18421	-1.31584
330	87.25	-1.19	-1.31733
331	87.5	-1.19579	-1.3188
332	87.75	-1.20159	-1.32025
333	88	-1.2074	-1.32166
334	88.25	-1.2132	-1.32305
335	88.5	-1.21901	-1.32442
336	88.75	-1.22483	-1.32576
337	89	-1.23064	-1.32707
338	89.25	-1.23646	-1.32836
339	89.5	-1.24229	-1.32962
340	89.75	-1.24812	-1.33086
341	90	-1.25394	-1.33208
342	90.25	-1.25977	-1.33328
343	90.5	-1.26561	-1.33445
344	90.75	-1.27144	-1.33561
345	91	-1.27728	-1.33674
346	91.25	-1.28312	-1.33787
347	91.5	-1.28895	-1.33897
348	91.75	-1.29479	-1.34007
349	92	-1.30064	-1.34115
350	92.25	-1.30648	-1.34222
351	92.5	-1.31232	-1.34328
352	92.75	-1.31816	-1.34433
353	93	-1.32401	-1.34537
354	93.25	-1.32985	-1.34641
355	93.5	-1.3357	-1.34745
356	93.75	-1.34154	-1.34848
357	94	-1.34739	-1.34951
358	94.25	-1.35323	-1.35054
359	94.5	-1.35908	-1.35157
360	94.75	-1.36492	-1.3526
361	95	-1.37077	-1.35363

## Sheet: MSpline Sspline DLCO Female
	age	Mspline	Sspline
1	5	-0.189362	1.46436
2	5.25	-0.188457	1.4582
3	5.5	-0.187553	1.45204
4	5.75	-0.186647	1.44588
5	6	-0.18574	1.43971
6	6.25	-0.184832	1.43354
7	6.5	-0.183921	1.42736
8	6.75	-0.183004	1.42118
9	7	-0.182081	1.415
10	7.25	-0.181151	1.40882
11	7.5	-0.18021	1.40265
12	7.75	-0.179258	1.39648
13	8	-0.178293	1.39033
14	8.25	-0.177314	1.38419
15	8.5	-0.176318	1.37806
16	8.75	-0.175305	1.37195
17	9	-0.174271	1.36584
18	9.25	-0.173217	1.35974
19	9.5	-0.172139	1.35365
20	9.75	-0.171037	1.34756
21	10	-0.169909	1.34149
22	10.25	-0.168754	1.33542
23	10.5	-0.167571	1.32936
24	10.75	-0.166359	1.32331
25	11	-0.165118	1.31725
26	11.25	-0.163848	1.3112
27	11.5	-0.16255	1.30514
28	11.75	-0.161224	1.29908
29	12	-0.159873	1.29303
30	12.25	-0.158496	1.28698
31	12.5	-0.157096	1.28093
32	12.75	-0.155674	1.27489
33	13	-0.154231	1.26886
34	13.25	-0.15277	1.26284
35	13.5	-0.151291	1.25683
36	13.75	-0.149798	1.25083
37	14	-0.14829	1.24485
38	14.25	-0.146771	1.23887
39	14.5	-0.145243	1.23291
40	14.75	-0.143706	1.22696
41	15	-0.142163	1.22102
42	15.25	-0.140616	1.21509
43	15.5	-0.139066	1.20918
44	15.75	-0.137516	1.20328
45	16	-0.135967	1.19739
46	16.25	-0.134421	1.19151
47	16.5	-0.13288	1.18564
48	16.75	-0.131345	1.17979
49	17	-0.129817	1.17394
50	17.25	-0.128298	1.16811
51	17.5	-0.126791	1.16229
52	17.75	-0.125296	1.15648
53	18	-0.123817	1.15068
54	18.25	-0.122355	1.14489
55	18.5	-0.120913	1.1391
56	18.75	-0.119493	1.13332
57	19	-0.118096	1.12753
58	19.25	-0.116726	1.12175
59	19.5	-0.115383	1.11597
60	19.75	-0.114071	1.11018
61	20	-0.112792	1.10439
62	20.25	-0.111547	1.09859
63	20.5	-0.110338	1.09279
64	20.75	-0.109168	1.08697
65	21	-0.108039	1.08114
66	21.25	-0.106952	1.0753
67	21.5	-0.105909	1.06944
68	21.75	-0.104911	1.06357
69	22	-0.10396	1.05768
70	22.25	-0.103056	1.05178
71	22.5	-0.102202	1.04587
72	22.75	-0.101398	1.03994
73	23	-0.100644	1.034
74	23.25	-0.0999421	1.02805
75	23.5	-0.0992927	1.02208
76	23.75	-0.0986966	1.0161
77	24	-0.0981547	1.01011
78	24.25	-0.0976677	1.00411
79	24.5	-0.0972359	0.998096
80	24.75	-0.0968593	0.992082
81	25	-0.0965382	0.986066
82	25.25	-0.0962725	0.980051
83	25.5	-0.0960618	0.974039
84	25.75	-0.0959056	0.968034
85	26	-0.0958034	0.962037
86	26.25	-0.0957547	0.956053
87	26.5	-0.0957592	0.950082
88	26.75	-0.0958168	0.944127
89	27	-0.0959271	0.938188
90	27.25	-0.0960901	0.932268
91	27.5	-0.0963058	0.926367
92	27.75	-0.0965744	0.920488
93	28	-0.0968961	0.914633
94	28.25	-0.0972711	0.908802
95	28.5	-0.0976996	0.902997
96	28.75	-0.0981819	0.897218
97	29	-0.0987182	0.891466
98	29.25	-0.0993088	0.885741
99	29.5	-0.099954	0.880044
100	29.75	-0.100654	0.874379
101	30	-0.101409	0.868746
102	30.25	-0.10222	0.863147
103	30.5	-0.103086	0.857584
104	30.75	-0.104007	0.852059
105	31	-0.104983	0.846573
106	31.25	-0.106013	0.841128
107	31.5	-0.107098	0.835726
108	31.75	-0.108236	0.830368
109	32	-0.109426	0.825055
110	32.25	-0.110668	0.819788
111	32.5	-0.111959	0.814568
112	32.75	-0.113301	0.809396
113	33	-0.114692	0.804272
114	33.25	-0.116131	0.799195
115	33.5	-0.117617	0.794166
116	33.75	-0.119151	0.789185
117	34	-0.120731	0.784251
118	34.25	-0.122356	0.779363
119	34.5	-0.124026	0.77452
120	34.75	-0.12574	0.769721
121	35	-0.127497	0.764964
122	35.25	-0.129298	0.760248
123	35.5	-0.13114	0.755574
124	35.75	-0.133022	0.750941
125	36	-0.134943	0.746349
126	36.25	-0.136902	0.741801
127	36.5	-0.138897	0.737296
128	36.75	-0.140927	0.732839
129	37	-0.14299	0.728429
130	37.25	-0.145086	0.72407
131	37.5	-0.147211	0.719762
132	37.75	-0.149365	0.715506
133	38	-0.151547	0.711302
134	38.25	-0.153754	0.70715
135	38.5	-0.155986	0.703049
136	38.75	-0.15824	0.699001
137	39	-0.160516	0.695003
138	39.25	-0.162812	0.691055
139	39.5	-0.165126	0.687159
140	39.75	-0.167458	0.683314
141	40	-0.169805	0.679523
142	40.25	-0.172168	0.675785
143	40.5	-0.174545	0.672102
144	40.75	-0.176935	0.668476
145	41	-0.179337	0.664906
146	41.25	-0.181751	0.661395
147	41.5	-0.184174	0.657943
148	41.75	-0.186606	0.654551
149	42	-0.189047	0.651219
150	42.25	-0.191495	0.647947
151	42.5	-0.193949	0.644736
152	42.75	-0.196407	0.641585
153	43	-0.19887	0.638492
154	43.25	-0.201336	0.635457
155	43.5	-0.203804	0.632477
156	43.75	-0.206273	0.629549
157	44	-0.208742	0.62667
158	44.25	-0.211211	0.623837
159	44.5	-0.213678	0.621049
160	44.75	-0.216145	0.618303
161	45	-0.218609	0.615598
162	45.25	-0.221072	0.612933
163	45.5	-0.223533	0.610307
164	45.75	-0.225992	0.607723
165	46	-0.22845	0.605182
166	46.25	-0.230906	0.602685
167	46.5	-0.23336	0.600231
168	46.75	-0.235814	0.597822
169	47	-0.238266	0.595457
170	47.25	-0.240719	0.593136
171	47.5	-0.243171	0.590859
172	47.75	-0.245624	0.588626
173	48	-0.248076	0.586438
174	48.25	-0.250529	0.584294
175	48.5	-0.252982	0.582197
176	48.75	-0.255438	0.580149
177	49	-0.257895	0.578151
178	49.25	-0.260356	0.576205
179	49.5	-0.26282	0.574311
180	49.75	-0.265289	0.57247
181	50	-0.267764	0.570683
182	50.25	-0.270245	0.56895
183	50.5	-0.272733	0.56727
184	50.75	-0.275231	0.565643
185	51	-0.277737	0.564068
186	51.25	-0.280255	0.562546
187	51.5	-0.282784	0.561075
188	51.75	-0.285325	0.559656
189	52	-0.28788	0.558289
190	52.25	-0.29045	0.556972
191	52.5	-0.293035	0.555708
192	52.75	-0.295637	0.554497
193	53	-0.298257	0.553342
194	53.25	-0.300897	0.552243
195	53.5	-0.303557	0.551201
196	53.75	-0.306238	0.550219
197	54	-0.308942	0.549297
198	54.25	-0.311669	0.548437
199	54.5	-0.314419	0.54764
200	54.75	-0.317195	0.546905
201	55	-0.319996	0.546232
202	55.25	-0.322824	0.545621
203	55.5	-0.32568	0.545074
204	55.75	-0.328562	0.544592
205	56	-0.331473	0.544176
206	56.25	-0.334411	0.543827
207	56.5	-0.337378	0.543546
208	56.75	-0.340375	0.543333
209	57	-0.343402	0.543189
210	57.25	-0.346459	0.543114
211	57.5	-0.349548	0.543108
212	57.75	-0.352669	0.543171
213	58	-0.355822	0.543304
214	58.25	-0.359009	0.543507
215	58.5	-0.362229	0.543778
216	58.75	-0.365484	0.544118
217	59	-0.368772	0.544524
218	59.25	-0.372096	0.544996
219	59.5	-0.375454	0.545532
220	59.75	-0.378848	0.54613
221	60	-0.382277	0.546789
222	60.25	-0.385741	0.547506
223	60.5	-0.389242	0.548283
224	60.75	-0.392779	0.549116
225	61	-0.396351	0.550007
226	61.25	-0.39996	0.550955
227	61.5	-0.403605	0.551957
228	61.75	-0.407285	0.553013
229	62	-0.411003	0.554121
230	62.25	-0.414756	0.55528
231	62.5	-0.418546	0.556489
232	62.75	-0.422371	0.557747
233	63	-0.426233	0.559052
234	63.25	-0.430132	0.560403
235	63.5	-0.434066	0.561799
236	63.75	-0.438036	0.56324
237	64	-0.442042	0.564723
238	64.25	-0.446084	0.566248
239	64.5	-0.450162	0.567813
240	64.75	-0.454276	0.569417
241	65	-0.458427	0.571059
242	65.25	-0.462614	0.572736
243	65.5	-0.466836	0.574448
244	65.75	-0.471095	0.57619
245	66	-0.475389	0.577962
246	66.25	-0.479719	0.579759
247	66.5	-0.484084	0.581579
248	66.75	-0.488484	0.583416
249	67	-0.492919	0.585266
250	67.25	-0.497389	0.587126
251	67.5	-0.501894	0.588989
252	67.75	-0.506433	0.590855
253	68	-0.511006	0.592717
254	68.25	-0.515612	0.594575
255	68.5	-0.520252	0.596424
256	68.75	-0.524923	0.598265
257	69	-0.529627	0.600095
258	69.25	-0.534362	0.601913
259	69.5	-0.539128	0.603717
260	69.75	-0.543923	0.605505
261	70	-0.548748	0.607275
262	70.25	-0.553601	0.609025
263	70.5	-0.558483	0.610752
264	70.75	-0.56339	0.612457
265	71	-0.568324	0.614136
266	71.25	-0.573283	0.615789
267	71.5	-0.578266	0.617413
268	71.75	-0.583272	0.619007
269	72	-0.588299	0.620568
270	72.25	-0.593347	0.622096
271	72.5	-0.598414	0.623587
272	72.75	-0.6035	0.625039
273	73	-0.608602	0.626451
274	73.25	-0.613721	0.62782
275	73.5	-0.618854	0.629145
276	73.75	-0.624	0.630423
277	74	-0.629158	0.631654
278	74.25	-0.634326	0.632837
279	74.5	-0.639505	0.633971
280	74.75	-0.644693	0.635056
281	75	-0.64989	0.636092
282	75.25	-0.655095	0.637081
283	75.5	-0.660308	0.638022
284	75.75	-0.665527	0.638916
285	76	-0.670754	0.639764
286	76.25	-0.675987	0.640567
287	76.5	-0.681225	0.641327
288	76.75	-0.686469	0.642044
289	77	-0.691717	0.64272
290	77.25	-0.696971	0.643357
291	77.5	-0.702228	0.643955
292	77.75	-0.707488	0.644515
293	78	-0.712752	0.645037
294	78.25	-0.718019	0.645522
295	78.5	-0.723288	0.645972
296	78.75	-0.72856	0.64639
297	79	-0.733835	0.646777
298	79.25	-0.739112	0.647136
299	79.5	-0.744391	0.647468
300	79.75	-0.749674	0.647773
301	80	-0.754958	0.648051
302	80.25	-0.760245	0.648304
303	80.5	-0.765534	0.648533
304	80.75	-0.770825	0.648738
305	81	-0.776119	0.648922
306	81.25	-0.781415	0.649085
307	81.5	-0.786713	0.649229
308	81.75	-0.792013	0.649354
309	82	-0.797316	0.64946
310	82.25	-0.80262	0.649548
311	82.5	-0.807927	0.649619
312	82.75	-0.813236	0.649672
313	83	-0.818547	0.649708
314	83.25	-0.82386	0.649727
315	83.5	-0.829174	0.649728
316	83.75	-0.834491	0.649713
317	84	-0.839809	0.64968
318	84.25	-0.845129	0.64963
319	84.5	-0.850451	0.649562
320	84.75	-0.855774	0.649477
321	85	-0.861099	0.649373
322	85.25	-0.866424	0.649252
323	85.5	-0.871752	0.649113
324	85.75	-0.877081	0.648956
325	86	-0.882411	0.648782
326	86.25	-0.887743	0.648591
327	86.5	-0.893076	0.648383
328	86.75	-0.89841	0.648157
329	87	-0.903746	0.647913
330	87.25	-0.909083	0.647651
331	87.5	-0.914422	0.647371
332	87.75	-0.919762	0.647074
333	88	-0.925103	0.64676
334	88.25	-0.930446	0.64643
335	88.5	-0.935789	0.646085
336	88.75	-0.941134	0.645726
337	89	-0.94648	0.645351
338	89.25	-0.951827	0.644964
339	89.5	-0.957175	0.644563
340	89.75	-0.962524	0.64415
341	90	-0.967873	0.643727
342	90.25	-0.973223	0.643293
343	90.5	-0.978574	0.642849
344	90.75	-0.983925	0.642396
345	91	-0.989276	0.641935
346	91.25	-0.994628	0.641465
347	91.5	-0.999979	0.640988
348	91.75	-1.00533	0.640503
349	92	-1.01068	0.640012
350	92.25	-1.01604	0.639516
351	92.5	-1.02139	0.639014
352	92.75	-1.02674	0.638507
353	93	-1.03209	0.637996
354	93.25	-1.03744	0.637481
355	93.5	-1.0428	0.636964
356	93.75	-1.04815	0.636444
357	94	-1.0535	0.635921
358	94.25	-1.05885	0.635398
359	94.5	-1.06421	0.634873
360	94.75	-1.06956	0.634348
361	95	-1.07491	0.633822

## Sheet: Mspline VA Female
	age	Mspline
1	5	-0.104937
2	5.25	-0.104147
3	5.5	-0.103357
4	5.75	-0.102565
5	6	-0.101771
6	6.25	-0.100974
7	6.5	-0.100173
8	6.75	-0.0993659
9	7	-0.0985524
10	7.25	-0.097731
11	7.5	-0.0969002
12	7.75	-0.0960588
13	8	-0.0952057
14	8.25	-0.0943393
15	8.5	-0.0934585
16	8.75	-0.0925615
17	9	-0.0916471
18	9.25	-0.0907138
19	9.5	-0.0897608
20	9.75	-0.0887876
21	10	-0.0877933
22	10.25	-0.0867777
23	10.5	-0.0857412
24	10.75	-0.0846849
25	11	-0.0836095
26	11.25	-0.0825163
27	11.5	-0.0814068
28	11.75	-0.080283
29	12	-0.0791468
30	12.25	-0.078
31	12.5	-0.0768448
32	12.75	-0.0756832
33	13	-0.0745173
34	13.25	-0.0733491
35	13.5	-0.0721808
36	13.75	-0.0710144
37	14	-0.0698522
38	14.25	-0.0686961
39	14.5	-0.0675475
40	14.75	-0.0664077
41	15	-0.0652779
42	15.25	-0.0641594
43	15.5	-0.0630536
44	15.75	-0.0619616
45	16	-0.0608849
46	16.25	-0.0598245
47	16.5	-0.0587817
48	16.75	-0.0577575
49	17	-0.056753
50	17.25	-0.0557692
51	17.5	-0.054807
52	17.75	-0.0538672
53	18	-0.0529505
54	18.25	-0.0520578
55	18.5	-0.05119
56	18.75	-0.0503476
57	19	-0.0495317
58	19.25	-0.048743
59	19.5	-0.0479822
60	19.75	-0.0472502
61	20	-0.0465477
62	20.25	-0.0458756
63	20.5	-0.0452341
64	20.75	-0.0446237
65	21	-0.0440446
66	21.25	-0.0434971
67	21.5	-0.0429816
68	21.75	-0.0424982
69	22	-0.0420471
70	22.25	-0.0416287
71	22.5	-0.0412426
72	22.75	-0.0408886
73	23	-0.0405666
74	23.25	-0.0402763
75	23.5	-0.0400174
76	23.75	-0.0397893
77	24	-0.0395918
78	24.25	-0.0394245
79	24.5	-0.0392869
80	24.75	-0.0391787
81	25	-0.0390996
82	25.25	-0.0390491
83	25.5	-0.0390266
84	25.75	-0.0390316
85	26	-0.0390633
86	26.25	-0.0391211
87	26.5	-0.0392047
88	26.75	-0.0393135
89	27	-0.0394471
90	27.25	-0.0396053
91	27.5	-0.0397878
92	27.75	-0.0399945
93	28	-0.0402256
94	28.25	-0.0404808
95	28.5	-0.0407601
96	28.75	-0.0410634
97	29	-0.0413908
98	29.25	-0.0417421
99	29.5	-0.0421176
100	29.75	-0.0425175
101	30	-0.042942
102	30.25	-0.0433913
103	30.5	-0.0438654
104	30.75	-0.0443643
105	31	-0.0448881
106	31.25	-0.0454365
107	31.5	-0.0460093
108	31.75	-0.0466063
109	32	-0.0472271
110	32.25	-0.0478713
111	32.5	-0.0485385
112	32.75	-0.0492285
113	33	-0.0499407
114	33.25	-0.0506748
115	33.5	-0.0514305
116	33.75	-0.0522075
117	34	-0.0530054
118	34.25	-0.0538241
119	34.5	-0.0546632
120	34.75	-0.0555225
121	35	-0.0564017
122	35.25	-0.0573007
123	35.5	-0.0582189
124	35.75	-0.0591561
125	36	-0.0601118
126	36.25	-0.0610856
127	36.5	-0.0620767
128	36.75	-0.0630844
129	37	-0.0641079
130	37.25	-0.0651465
131	37.5	-0.0661996
132	37.75	-0.0672664
133	38	-0.0683465
134	38.25	-0.0694392
135	38.5	-0.0705439
136	38.75	-0.0716599
137	39	-0.0727866
138	39.25	-0.0739233
139	39.5	-0.0750698
140	39.75	-0.0762256
141	40	-0.0773905
142	40.25	-0.0785642
143	40.5	-0.0797465
144	40.75	-0.080937
145	41	-0.0821357
146	41.25	-0.0833423
147	41.5	-0.0845564
148	41.75	-0.0857777
149	42	-0.0870059
150	42.25	-0.0882405
151	42.5	-0.0894813
152	42.75	-0.0907279
153	43	-0.09198
154	43.25	-0.0932373
155	43.5	-0.0944999
156	43.75	-0.0957676
157	44	-0.0970408
158	44.25	-0.0983193
159	44.5	-0.0996034
160	44.75	-0.100893
161	45	-0.102188
162	45.25	-0.103489
163	45.5	-0.104796
164	45.75	-0.106109
165	46	-0.107429
166	46.25	-0.108754
167	46.5	-0.110086
168	46.75	-0.111425
169	47	-0.11277
170	47.25	-0.114121
171	47.5	-0.115479
172	47.75	-0.116843
173	48	-0.118213
174	48.25	-0.11959
175	48.5	-0.120974
176	48.75	-0.122364
177	49	-0.123763
178	49.25	-0.125169
179	49.5	-0.126584
180	49.75	-0.128009
181	50	-0.129442
182	50.25	-0.130886
183	50.5	-0.13234
184	50.75	-0.133805
185	51	-0.135281
186	51.25	-0.136768
187	51.5	-0.138267
188	51.75	-0.139777
189	52	-0.1413
190	52.25	-0.142835
191	52.5	-0.144382
192	52.75	-0.145942
193	53	-0.147514
194	53.25	-0.149099
195	53.5	-0.150697
196	53.75	-0.152308
197	54	-0.153932
198	54.25	-0.155569
199	54.5	-0.157219
200	54.75	-0.158882
201	55	-0.160558
202	55.25	-0.162247
203	55.5	-0.163947
204	55.75	-0.16566
205	56	-0.167385
206	56.25	-0.169121
207	56.5	-0.170869
208	56.75	-0.172628
209	57	-0.174399
210	57.25	-0.176181
211	57.5	-0.177975
212	57.75	-0.179781
213	58	-0.181598
214	58.25	-0.183428
215	58.5	-0.185269
216	58.75	-0.187123
217	59	-0.188988
218	59.25	-0.190867
219	59.5	-0.192758
220	59.75	-0.194661
221	60	-0.196578
222	60.25	-0.198508
223	60.5	-0.200452
224	60.75	-0.202408
225	61	-0.204379
226	61.25	-0.206362
227	61.5	-0.208358
228	61.75	-0.210367
229	62	-0.212389
230	62.25	-0.214424
231	62.5	-0.21647
232	62.75	-0.218529
233	63	-0.2206
234	63.25	-0.222683
235	63.5	-0.224777
236	63.75	-0.226882
237	64	-0.228999
238	64.25	-0.231126
239	64.5	-0.233265
240	64.75	-0.235415
241	65	-0.237577
242	65.25	-0.239749
243	65.5	-0.241934
244	65.75	-0.244129
245	66	-0.246336
246	66.25	-0.248554
247	66.5	-0.250783
248	66.75	-0.253024
249	67	-0.255275
250	67.25	-0.257537
251	67.5	-0.25981
252	67.75	-0.262094
253	68	-0.264387
254	68.25	-0.26669
255	68.5	-0.269003
256	68.75	-0.271326
257	69	-0.273658
258	69.25	-0.275998
259	69.5	-0.278348
260	69.75	-0.280706
261	70	-0.283072
262	70.25	-0.285446
263	70.5	-0.287828
264	70.75	-0.290217
265	71	-0.292614
266	71.25	-0.295016
267	71.5	-0.297424
268	71.75	-0.299838
269	72	-0.302255
270	72.25	-0.304676
271	72.5	-0.307101
272	72.75	-0.309527
273	73	-0.311954
274	73.25	-0.314382
275	73.5	-0.316809
276	73.75	-0.319236
277	74	-0.32166
278	74.25	-0.324082
279	74.5	-0.326502
280	74.75	-0.328919
281	75	-0.331332
282	75.25	-0.333743
283	75.5	-0.33615
284	75.75	-0.338554
285	76	-0.340954
286	76.25	-0.34335
287	76.5	-0.345743
288	76.75	-0.348131
289	77	-0.350516
290	77.25	-0.352896
291	77.5	-0.355271
292	77.75	-0.357642
293	78	-0.360007
294	78.25	-0.362368
295	78.5	-0.364725
296	78.75	-0.367076
297	79	-0.369423
298	79.25	-0.371766
299	79.5	-0.374104
300	79.75	-0.376438
301	80	-0.378768
302	80.25	-0.381093
303	80.5	-0.383415
304	80.75	-0.385732
305	81	-0.388047
306	81.25	-0.390357
307	81.5	-0.392664
308	81.75	-0.394968
309	82	-0.397269
310	82.25	-0.399566
311	82.5	-0.40186
312	82.75	-0.404151
313	83	-0.406439
314	83.25	-0.408724
315	83.5	-0.411007
316	83.75	-0.413286
317	84	-0.415562
318	84.25	-0.417836
319	84.5	-0.420107
320	84.75	-0.422375
321	85	-0.42464
322	85.25	-0.426902
323	85.5	-0.429162
324	85.75	-0.431419
325	86	-0.433673
326	86.25	-0.435924
327	86.5	-0.438173
328	86.75	-0.440419
329	87	-0.442663
330	87.25	-0.444905
331	87.5	-0.447144
332	87.75	-0.449382
333	88	-0.451617
334	88.25	-0.453851
335	88.5	-0.456084
336	88.75	-0.458315
337	89	-0.460545
338	89.25	-0.462774
339	89.5	-0.465002
340	89.75	-0.467229
341	90	-0.469455
342	90.25	-0.47168
343	90.5	-0.473905
344	90.75	-0.476128
345	91	-0.478351
346	91.25	-0.480573
347	91.5	-0.482795
348	91.75	-0.485016
349	92	-0.487236
350	92.25	-0.489456
351	92.5	-0.491675
352	92.75	-0.493894
353	93	-0.496112
354	93.25	-0.49833
355	93.5	-0.500548
356	93.75	-0.502765
357	94	-0.504982
358	94.25	-0.507199
359	94.5	-0.509415
360	94.75	-0.511632
361	95	-0.513849

## Sheet: MSpline VA Male
	age	Mspline
1	5	-0.103617
2	5.25	-0.102422
3	5.5	-0.101227
4	5.75	-0.10003
5	6	-0.0988326
6	6.25	-0.0976325
7	6.5	-0.0964293
8	6.75	-0.0952222
9	7	-0.0940101
10	7.25	-0.0927922
11	7.5	-0.0915674
12	7.75	-0.0903348
13	8	-0.0890933
14	8.25	-0.0878419
15	8.5	-0.0865799
16	8.75	-0.0853063
17	9	-0.0840205
18	9.25	-0.0827215
19	9.5	-0.0814087
20	9.75	-0.0800816
21	10	-0.0787395
22	10.25	-0.0773818
23	10.5	-0.0760082
24	10.75	-0.0746185
25	11	-0.0732122
26	11.25	-0.0717892
27	11.5	-0.0703495
28	11.75	-0.0688933
29	12	-0.0674205
30	12.25	-0.0659315
31	12.5	-0.0644271
32	12.75	-0.0629083
33	13	-0.0613761
34	13.25	-0.0598315
35	13.5	-0.0582757
36	13.75	-0.0567101
37	14	-0.0551359
38	14.25	-0.0535544
39	14.5	-0.0519671
40	14.75	-0.0503756
41	15	-0.0487811
42	15.25	-0.0471854
43	15.5	-0.0455903
44	15.75	-0.0439974
45	16	-0.0424087
46	16.25	-0.040826
47	16.5	-0.0392507
48	16.75	-0.0376843
49	17	-0.0361283
50	17.25	-0.0345841
51	17.5	-0.0330529
52	17.75	-0.0315357
53	18	-0.0300338
54	18.25	-0.0285482
55	18.5	-0.0270801
56	18.75	-0.0256304
57	19	-0.0242002
58	19.25	-0.0227905
59	19.5	-0.0214024
60	19.75	-0.0200368
61	20	-0.0186948
62	20.25	-0.0173772
63	20.5	-0.0160849
64	20.75	-0.014819
65	21	-0.0135801
66	21.25	-0.0123694
67	21.5	-0.0111873
68	21.75	-0.0100347
69	22	-0.00891218
70	22.25	-0.00782042
71	22.5	-0.00676001
72	22.75	-0.00573149
73	23	-0.00473543
74	23.25	-0.00377238
75	23.5	-0.00284285
76	23.75	-0.00194736
77	24	-0.00108643
78	24.25	-0.000260523
79	24.5	0.000529978
80	24.75	0.00128474
81	25	0.00200344
82	25.25	0.00268572
83	25.5	0.00333125
84	25.75	0.00393968
85	26	0.00451064
86	26.25	0.00504382
87	26.5	0.00553891
88	26.75	0.00599564
89	27	0.00641374
90	27.25	0.00679299
91	27.5	0.00713354
92	27.75	0.00743559
93	28	0.00769934
94	28.25	0.00792501
95	28.5	0.00811281
96	28.75	0.00826296
97	29	0.00837569
98	29.25	0.00845124
99	29.5	0.00848994
100	29.75	0.00849218
101	30	0.00845833
102	30.25	0.00838876
103	30.5	0.0082839
104	30.75	0.00814421
105	31	0.00797012
106	31.25	0.0077621
107	31.5	0.00752065
108	31.75	0.00724626
109	32	0.00693946
110	32.25	0.00660083
111	32.5	0.00623124
112	32.75	0.00583163
113	33	0.00540295
114	33.25	0.00494612
115	33.5	0.00446191
116	33.75	0.00395111
117	34	0.00341448
118	34.25	0.00285277
119	34.5	0.00226675
120	34.75	0.00165716
121	35	0.00102476
122	35.25	0.000370265
123	35.5	-0.000305692
124	35.75	-0.00100252
125	36	-0.00171961
126	36.25	-0.00245639
127	36.5	-0.00321232
128	36.75	-0.00398688
129	37	-0.00477954
130	37.25	-0.00558979
131	37.5	-0.00641702
132	37.75	-0.00726063
133	38	-0.00812001
134	38.25	-0.00899461
135	38.5	-0.00988403
136	38.75	-0.010788
137	39	-0.011706
138	39.25	-0.012638
139	39.5	-0.0135836
140	39.75	-0.0145428
141	40	-0.0155155
142	40.25	-0.0165015
143	40.5	-0.0175006
144	40.75	-0.0185124
145	41	-0.0195367
146	41.25	-0.0205731
147	41.5	-0.0216213
148	41.75	-0.0226808
149	42	-0.0237512
150	42.25	-0.0248321
151	42.5	-0.025923
152	42.75	-0.0270234
153	43	-0.028133
154	43.25	-0.0292512
155	43.5	-0.0303776
156	43.75	-0.0315115
157	44	-0.0326523
158	44.25	-0.0337997
159	44.5	-0.034953
160	44.75	-0.036112
161	45	-0.0372761
162	45.25	-0.0384452
163	45.5	-0.0396191
164	45.75	-0.0407978
165	46	-0.0419812
166	46.25	-0.0431693
167	46.5	-0.0443618
168	46.75	-0.0455587
169	47	-0.0467597
170	47.25	-0.0479647
171	47.5	-0.0491734
172	47.75	-0.0503857
173	48	-0.0516015
174	48.25	-0.0528208
175	48.5	-0.0540438
176	48.75	-0.055271
177	49	-0.0565027
178	49.25	-0.0577392
179	49.5	-0.058981
180	49.75	-0.0602283
181	50	-0.0614816
182	50.25	-0.0627411
183	50.5	-0.0640072
184	50.75	-0.06528
185	51	-0.0665597
186	51.25	-0.0678466
187	51.5	-0.0691406
188	51.75	-0.0704416
189	52	-0.0717494
190	52.25	-0.0730641
191	52.5	-0.0743853
192	52.75	-0.0757131
193	53	-0.0770473
194	53.25	-0.0783877
195	53.5	-0.079734
196	53.75	-0.0810859
197	54	-0.0824432
198	54.25	-0.0838055
199	54.5	-0.0851725
200	54.75	-0.0865439
201	55	-0.0879195
202	55.25	-0.089299
203	55.5	-0.0906818
204	55.75	-0.0920677
205	56	-0.0934562
206	56.25	-0.0948467
207	56.5	-0.0962388
208	56.75	-0.0976318
209	57	-0.0990251
210	57.25	-0.100418
211	57.5	-0.101811
212	57.75	-0.103202
213	58	-0.104592
214	58.25	-0.10598
215	58.5	-0.107366
216	58.75	-0.10875
217	59	-0.110131
218	59.25	-0.111511
219	59.5	-0.112887
220	59.75	-0.114262
221	60	-0.115634
222	60.25	-0.117003
223	60.5	-0.118369
224	60.75	-0.119734
225	61	-0.121095
226	61.25	-0.122455
227	61.5	-0.123812
228	61.75	-0.125167
229	62	-0.12652
230	62.25	-0.127872
231	62.5	-0.129223
232	62.75	-0.130572
233	63	-0.131921
234	63.25	-0.133269
235	63.5	-0.134618
236	63.75	-0.135966
237	64	-0.137315
238	64.25	-0.138665
239	64.5	-0.140017
240	64.75	-0.14137
241	65	-0.142726
242	65.25	-0.144085
243	65.5	-0.145447
244	65.75	-0.146811
245	66	-0.148179
246	66.25	-0.14955
247	66.5	-0.150924
248	66.75	-0.152302
249	67	-0.153684
250	67.25	-0.15507
251	67.5	-0.15646
252	67.75	-0.157854
253	68	-0.159254
254	68.25	-0.160657
255	68.5	-0.162066
256	68.75	-0.163479
257	69	-0.164897
258	69.25	-0.16632
259	69.5	-0.167747
260	69.75	-0.16918
261	70	-0.170618
262	70.25	-0.17206
263	70.5	-0.173507
264	70.75	-0.174959
265	71	-0.176414
266	71.25	-0.177874
267	71.5	-0.179337
268	71.75	-0.180803
269	72	-0.182273
270	72.25	-0.183747
271	72.5	-0.185224
272	72.75	-0.186704
273	73	-0.188188
274	73.25	-0.189675
275	73.5	-0.191165
276	73.75	-0.192659
277	74	-0.194155
278	74.25	-0.195655
279	74.5	-0.197157
280	74.75	-0.198662
281	75	-0.200171
282	75.25	-0.201681
283	75.5	-0.203195
284	75.75	-0.204711
285	76	-0.20623
286	76.25	-0.207751
287	76.5	-0.209275
288	76.75	-0.210801
289	77	-0.21233
290	77.25	-0.213862
291	77.5	-0.215396
292	77.75	-0.216932
293	78	-0.218471
294	78.25	-0.220012
295	78.5	-0.221555
296	78.75	-0.2231
297	79	-0.224647
298	79.25	-0.226195
299	79.5	-0.227746
300	79.75	-0.229297
301	80	-0.230851
302	80.25	-0.232406
303	80.5	-0.233963
304	80.75	-0.235522
305	81	-0.237083
306	81.25	-0.238645
307	81.5	-0.240209
308	81.75	-0.241776
309	82	-0.243344
310	82.25	-0.244914
311	82.5	-0.246486
312	82.75	-0.248061
313	83	-0.249637
314	83.25	-0.251216
315	83.5	-0.252796
316	83.75	-0.254379
317	84	-0.255964
318	84.25	-0.257551
319	84.5	-0.259141
320	84.75	-0.260732
321	85	-0.262326
322	85.25	-0.263922
323	85.5	-0.265521
324	85.75	-0.267121
325	86	-0.268724
326	86.25	-0.270329
327	86.5	-0.271936
328	86.75	-0.273546
329	87	-0.275157
330	87.25	-0.276771
331	87.5	-0.278386
332	87.75	-0.280003
333	88	-0.281623
334	88.25	-0.283244
335	88.5	-0.284867
336	88.75	-0.286492
337	89	-0.288118
338	89.25	-0.289747
339	89.5	-0.291377
340	89.75	-0.293008
341	90	-0.294642
342	90.25	-0.296276
343	90.5	-0.297913
344	90.75	-0.299551
345	91	-0.30119
346	91.25	-0.302832
347	91.5	-0.304475
348	91.75	-0.306119
349	92	-0.307765
350	92.25	-0.309413
351	92.5	-0.311063
352	92.75	-0.312713
353	93	-0.314365
354	93.25	-0.316018
355	93.5	-0.317672
356	93.75	-0.319326
357	94	-0.320981
358	94.25	-0.322636
359	94.5	-0.324292
360	94.75	-0.325948
361	95	-0.327604
